# Supplementary material
Source: Royal Society of Chemistry journal article supplement (doi:10.1039/d6tb00705h)
Supplement: d6tb00705h1.pdf [file d6tb00705h1.pdf]

## Extracellular Vesicle-Integrated Gelatin Sponges Enhance Angiogenesis and Cell Migration in Wound Healing

### Supplementary Figure

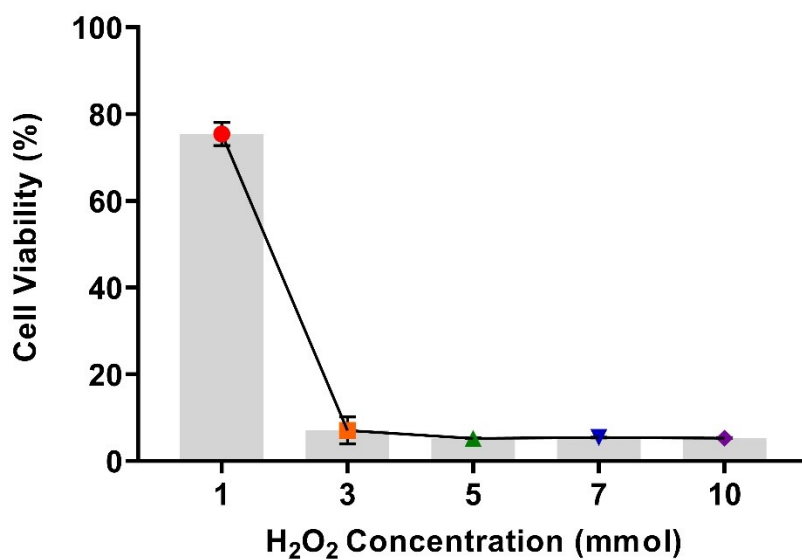

**Supplementary Figure 1:** Dose-response of H<sub>2</sub>O<sub>2</sub> on HaCaT cells (n = 5). Data are represented as mean ± SD.
